# Supplementary material for: Functionalized magnetic nanobeads for SERS-based detection of Staphylococcus aureus
Source: Royal Society of Chemistry journal article supplement (doi:10.1039/d3ay00653k), 2023-01-01
Supplement: d3ay00653k1.pdf [file d3ay00653k1.pdf]

## Supplementary Materials

### Functionalized magnetic nanobeads for SERS-based detection of *Staphylococcus aureus*

Shuaifeng Ji<sup>a,b,#</sup>, Yunfeng Xiang<sup>a,b,#</sup>, Dianpeng Han<sup>b</sup>, Chenghua Liu<sup>c</sup>,  
Yuwan Du<sup>b</sup>, Yuan Peng<sup>b</sup>, Shuang Li<sup>b</sup>, Shuyue Ren<sup>b</sup>, Kang Qin<sup>b</sup>, Yu Wang<sup>b</sup>,  
Huanying Zhou<sup>b</sup>, Zhenhong Jia<sup>a,\*</sup>, Zhixian Gao<sup>b,\*</sup>

<sup>a</sup> School of Information Science and Engineering, Xinjiang University,  
Urumqi 83000, China

<sup>b</sup>Tianjin Key Laboratory of Risk Assessment and Control Technology for  
Environment and Food Safety, Tianjin Institute of Environmental and  
Operational Medicine, Tianjin 300050, China.

<sup>c</sup>State Key Laboratory of Toxicology and Medical Countermeasures,  
Beijing Institute of Pharmacology and Toxicology, Beijing 100850, China

<sup>#</sup> These authors contributed equally to this work

#### **\*Corresponding author:**

Zhenhong Jia: e-mail, [jzh@xju.edu.cn](mailto:jzh@xju.edu.cn)

Zhixian Gao: e-mail, [gaozhx@163.com](mailto:gaozhx@163.com); Tel/Fax:86-022-84655403

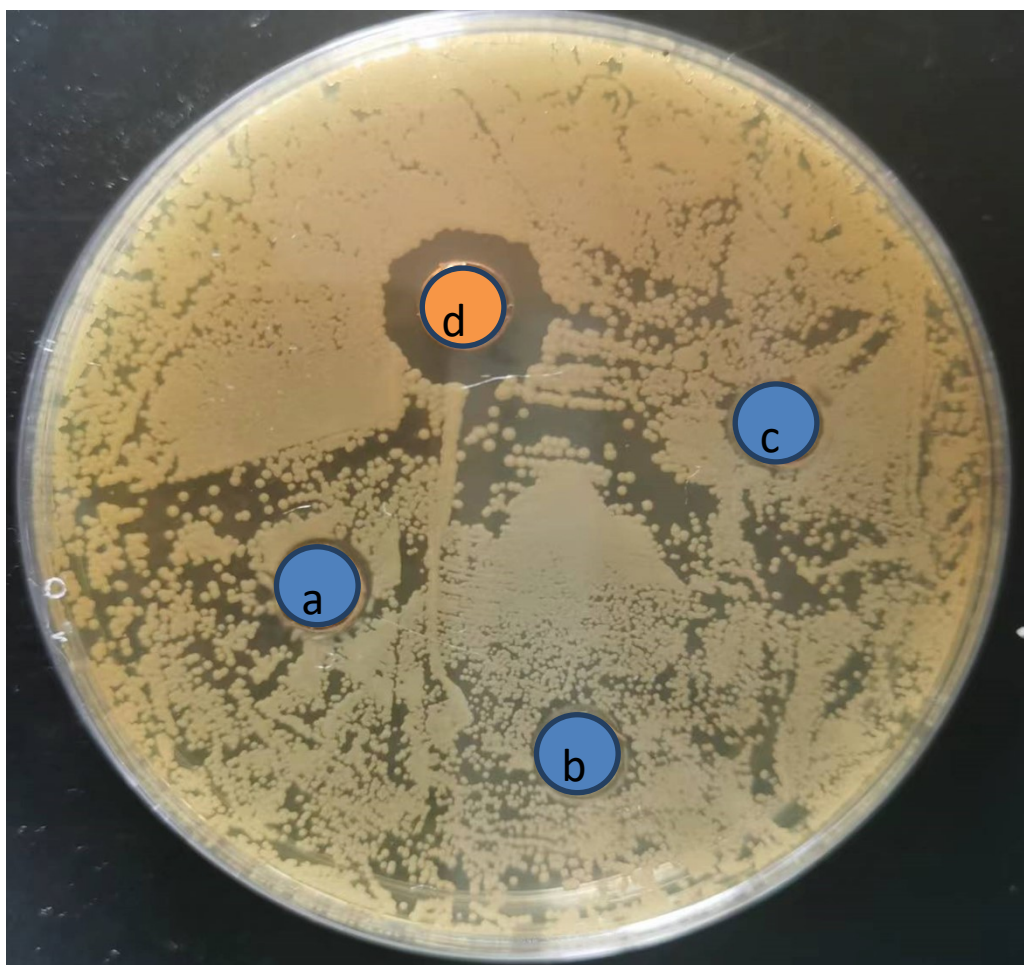

**Fig. S1** Antibacterial circle test of (a) MBs, (b) PEG-MBs, (c) BSA-PEG-MBs, and (d) TEI-BPBs.

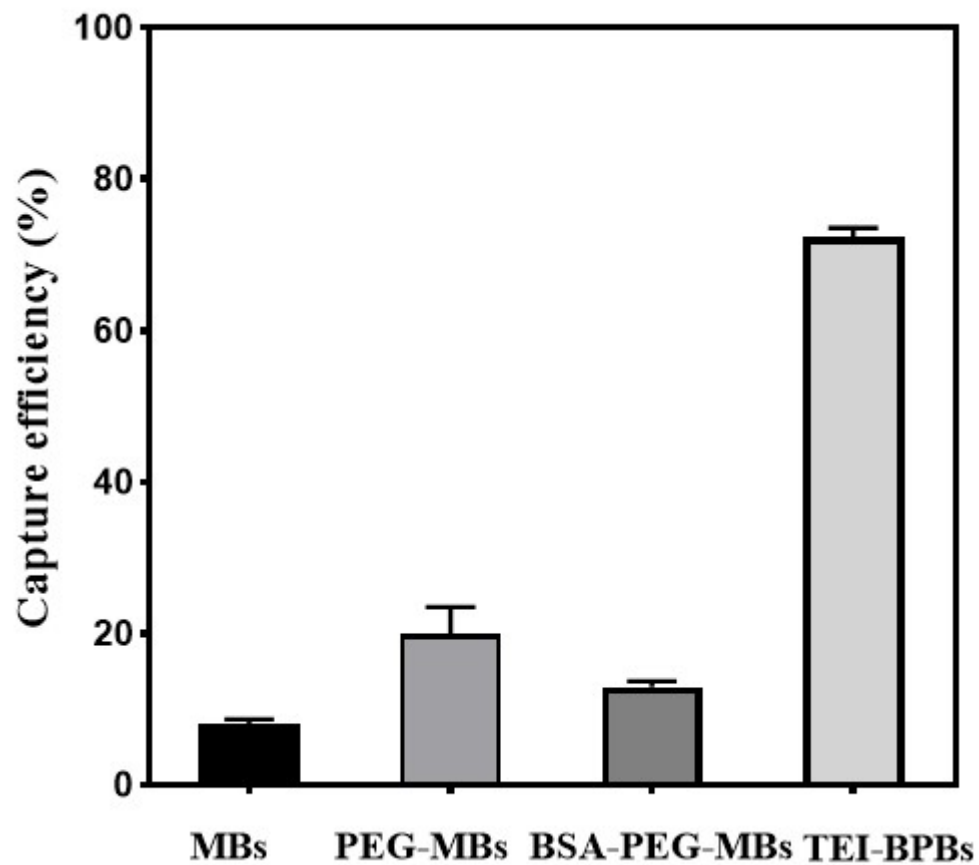

**Fig. S2** The capture efficiency of MBs, PEG-MBs, BSA-PEG-MBs and TEI-BPBs

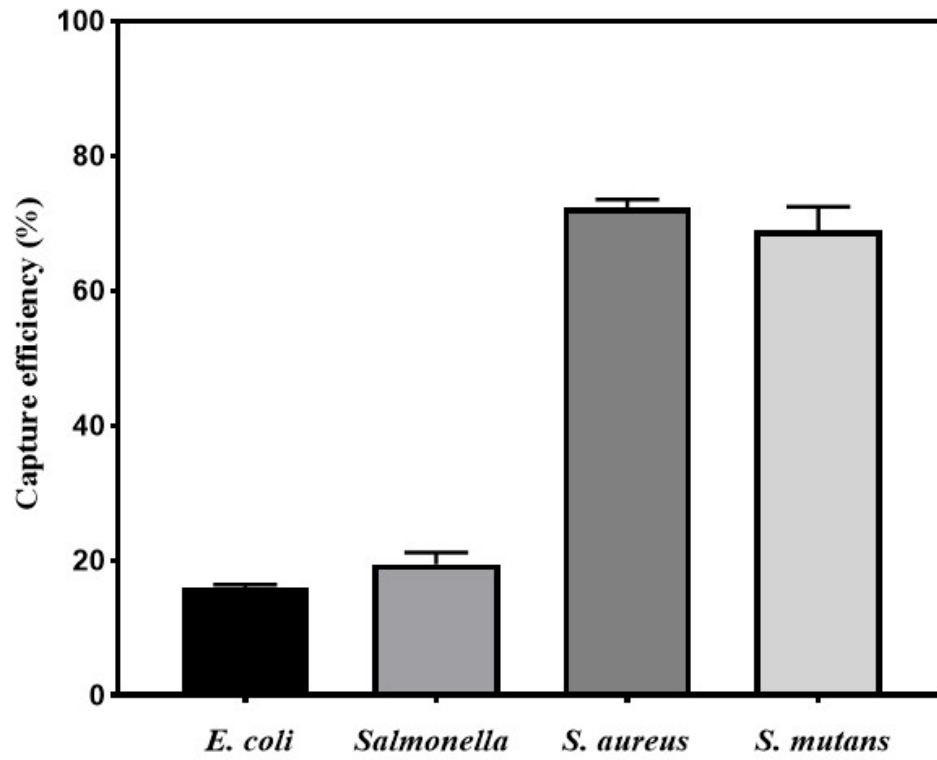

**Fig. S3** Capture efficiency of TEI-BPBs to *E. coli*, *Salmonella*, *S. aureus* and *S. mutans*

A

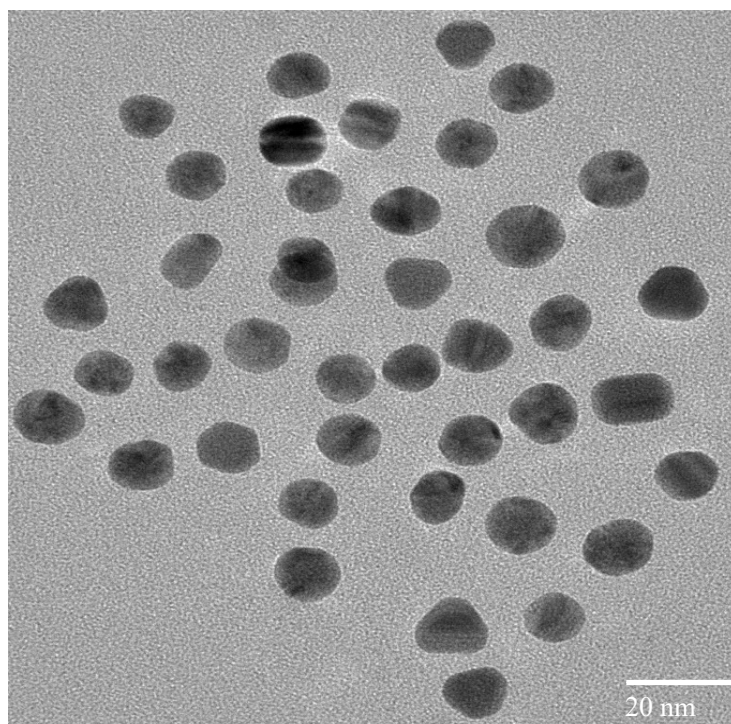

B

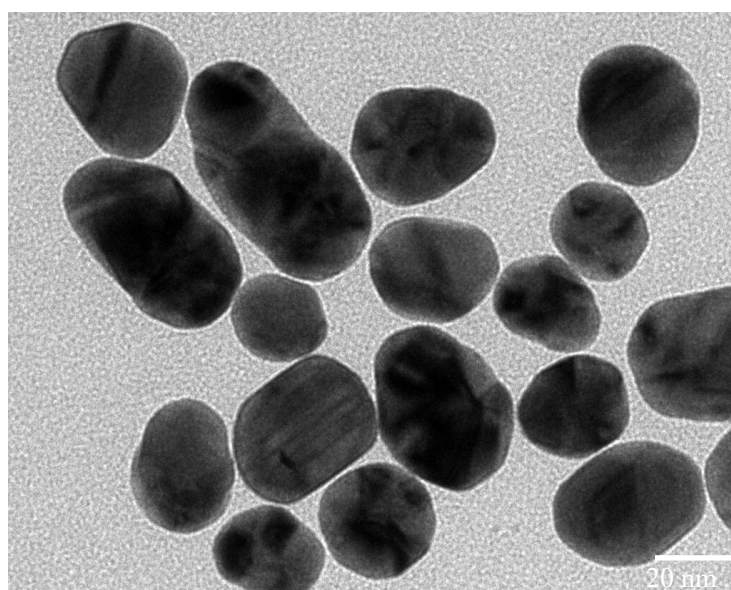

**Fig. S4** Comparison of particle distribution before and after coupling of gold nanoparticles. (A) Au; (B) SERS tags

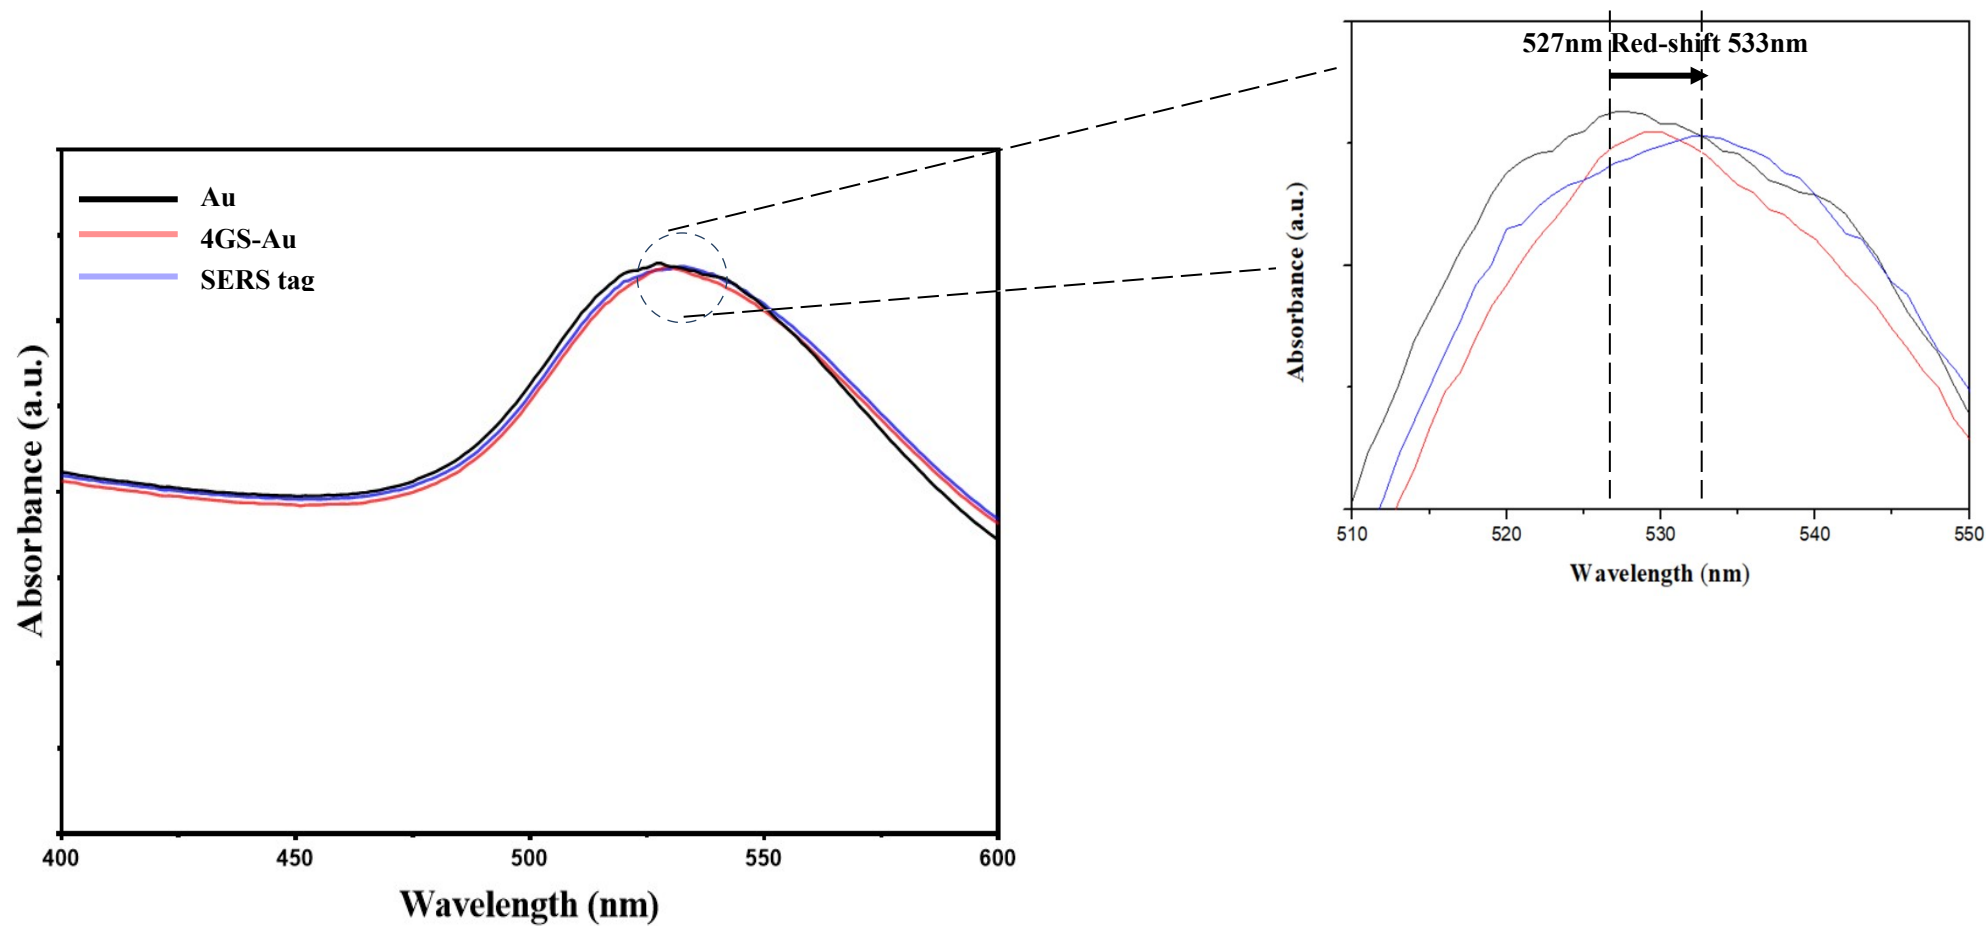

**Fig. S5** UV-Vis spectra of AuNPs (black), 4GS@AuNPs (red) and immuno-AuNPs (blue). The enlarged spectra show a 6nm red shift of SPR absorbance peak upon conjugation of 4GS and antibodies to the surface of AuNPs

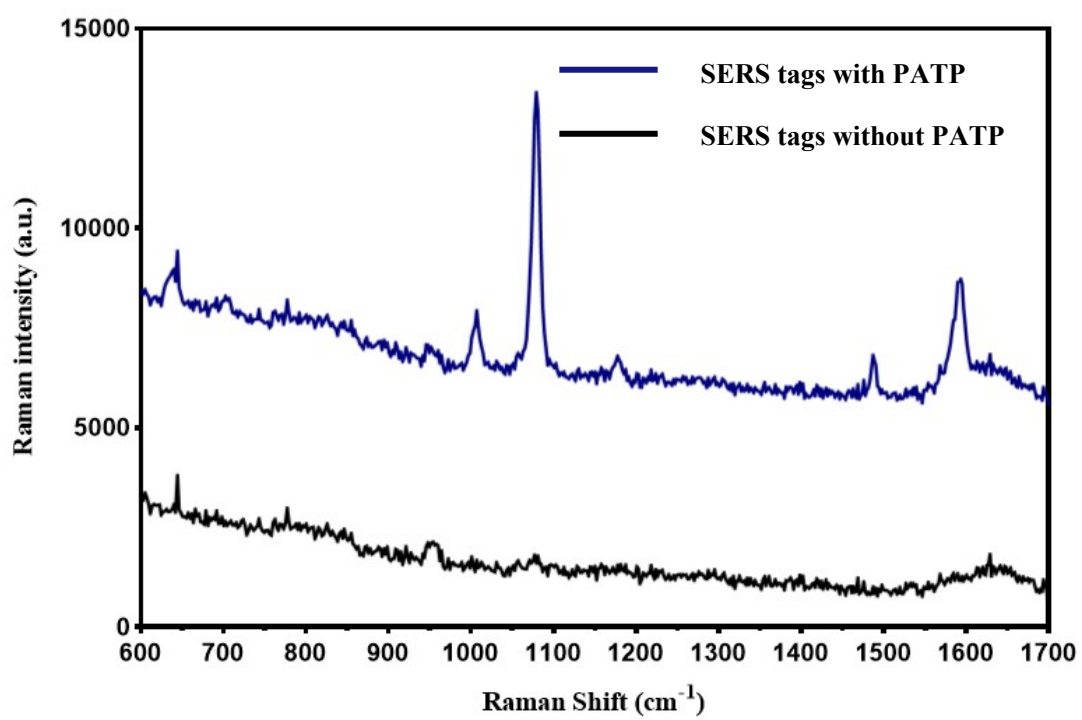

**Fig. S6** Peak change of SERS label before and after adding PATP

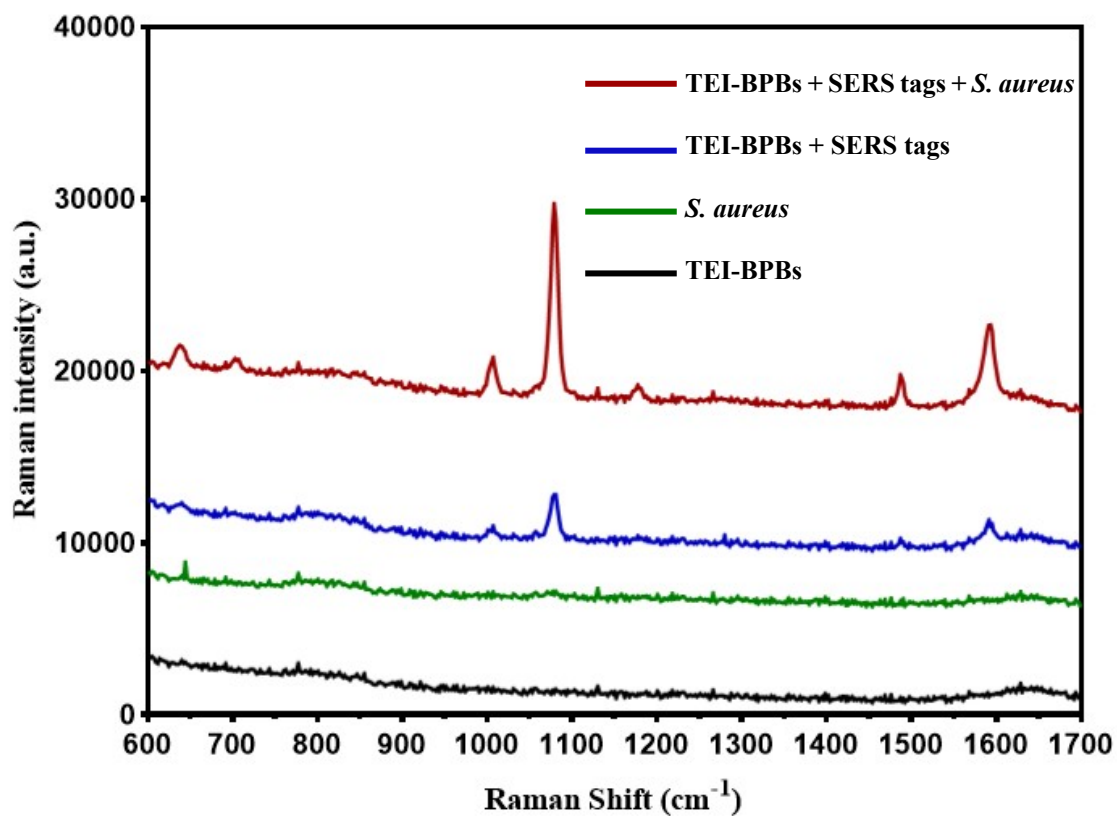

**Fig. S7** SERS spectra of magnetic beads and SERS tags were captured in the absence and presence of *S. aureus*. The intensity of the SERS signal was significantly amplified when the sandwiched SERS tag was bound to the bacterial-magnetic bead complex



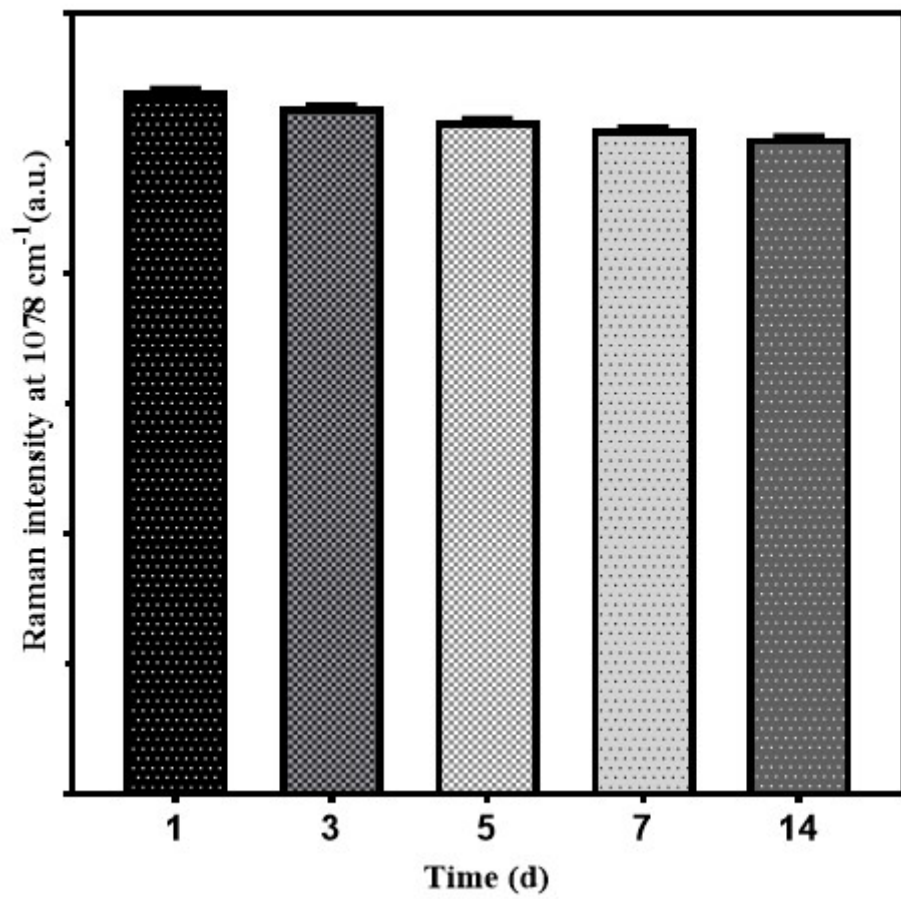

**Fig. S8** Stability testing of SERS labels

**Table S1** Bacterial strains used in this study.

| Number | Bacteria strain                  | Source        | Reference |
|--------|----------------------------------|---------------|-----------|
| 1      | <i>S. aureus</i> NCTC8325        | (Novick 1967) | [1]       |
| 2      | <i>E. coli</i> O157:H7           | EDL933        | [2]       |
| 3      | <i>Listeria L. monocytogenes</i> | ATCC19111     |           |
| 4      | <i>Salmonella S. typhimurium</i> | CVCC541       | [2]       |
| 5      | <i>Shigella flexneri</i>         | ATCC29903     |           |
| 6      | <i>Streptococcus mutans</i>      | ATCC25175     |           |

[1] R. Novick, Properties of a cryptic high-frequency transducing phage in *Staphylococcus aureus*, *Virology* 33(1) (1967) 155-66.

[2] X. Sun, Y. Wang, L. Zhang, S. Liu, M. Zhang, J. Wang, B. Ning, Y. Peng, J. He, Y. Hu, Z. Gao, CRISPR-Cas9 Triggered Two-Step Isothermal Amplification Method for *E. coli* O157:H7 Detection Based on a Metal-Organic Framework Platform, *Analytical chemistry* 92(4) (2020) 3032-3041.
